# Supplementary material for: Stacking Machine Learning Algorithms for Biomarker-Based Preoperative Diagnosis of a Pelvic Mass
Source: MDPI journal article supplement (doi:10.3390/cancers14051291), 2022-03-02
Supplement: s1 [file s1]

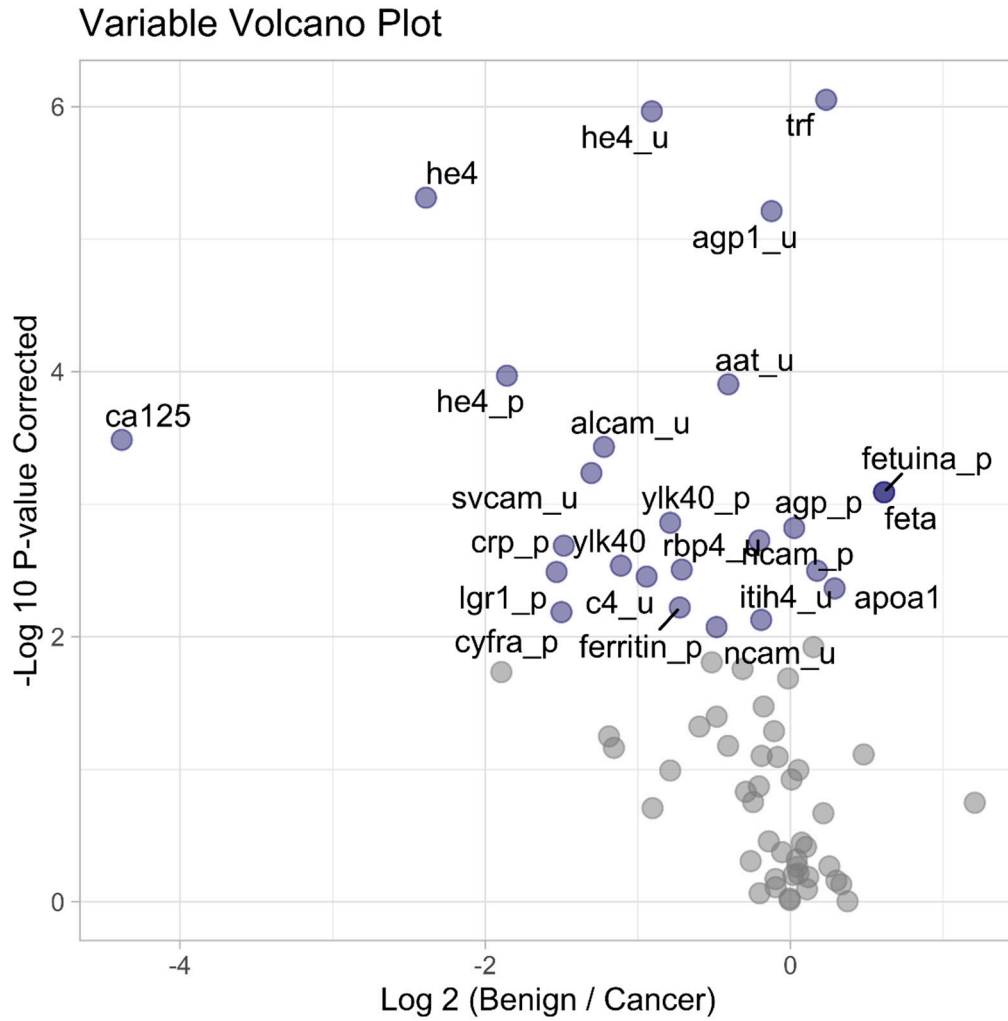

**Figure S1.** Univariate analysis of non-parametric Mann-Whitney test.  $p$ -values are corrected with False Discovery Rate (FDR) correction. Biomarkers with corrected  $p$ -value  $< 0.01$  are labeled.

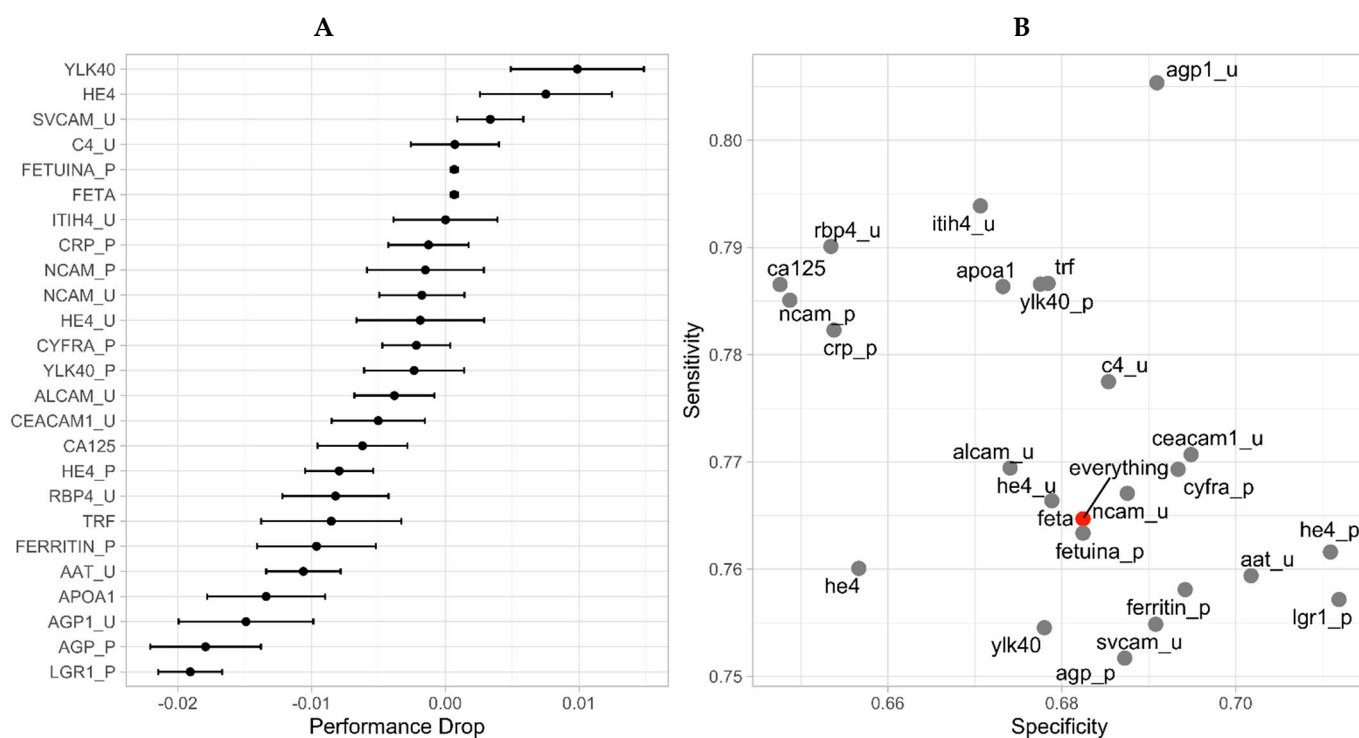

**Figure S2.** Logistic Regression model of 25 statistically significant variables. **(A)** Positive values indicate improved model performance (ROC AUC) with biomarker exclusion from the logistic regression model. The mean performance drop is represented by the circle; standard error is indicated by the error bars. **(B)** Specificity versus sensitivity dot plot. Labels indicate when that biomarker is excluded from the logistic regression model.

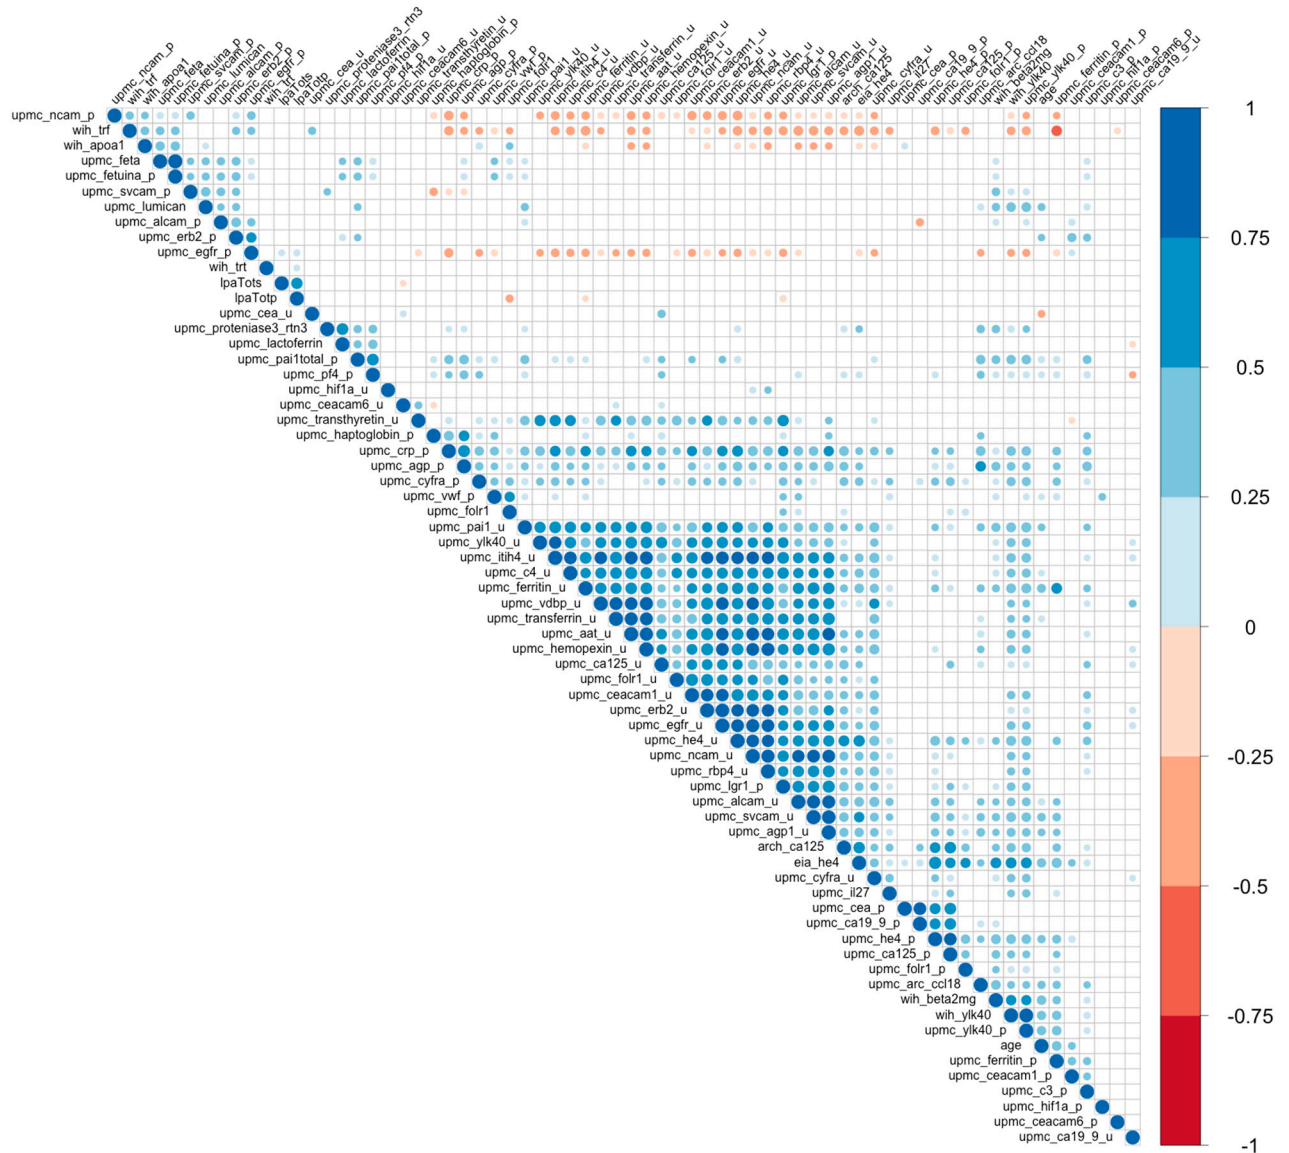

**Figure S3.** Pairwise Spearman rank coefficient of all numerical variables. Non-significant correlations are left white. Negative correlations are indicated in red. Positive correlations are indicated in blue.

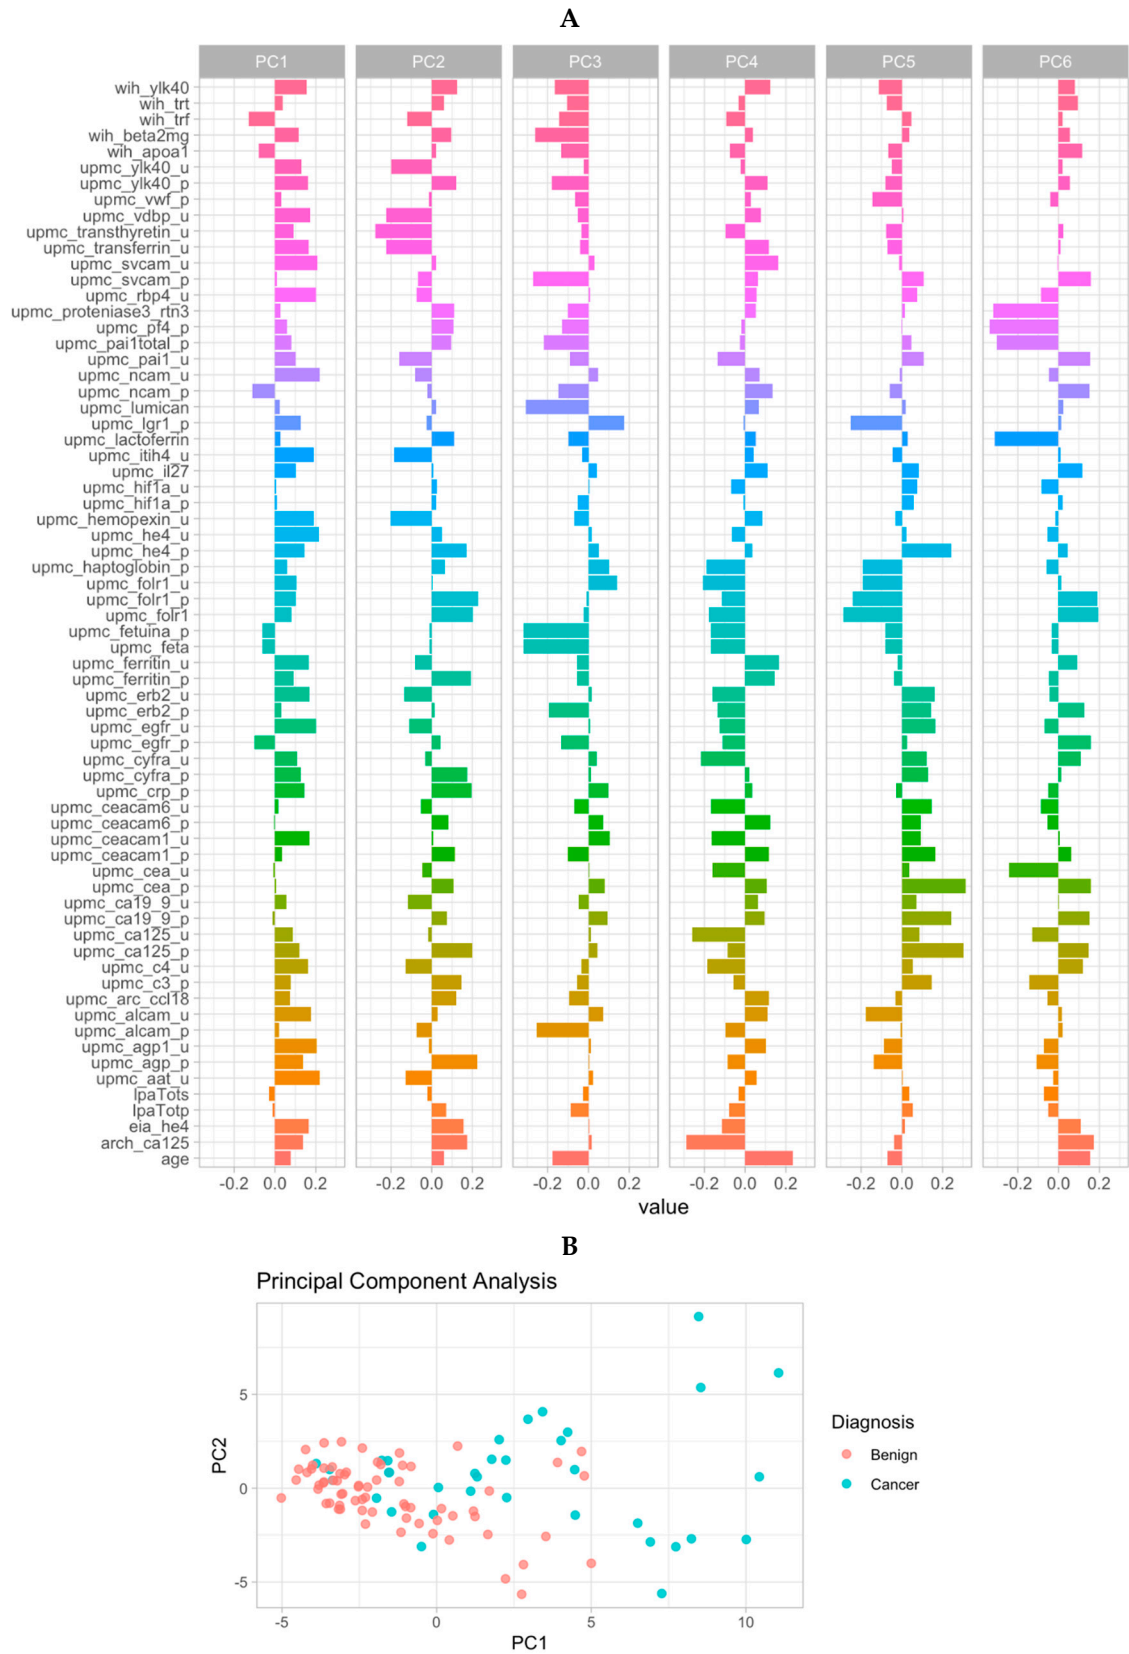

**Figure S4.** (A) Principal Component Analysis of all numerical variables. (B) First principal component ( $x$ -axis) plotted against the second principal component ( $y$ -axis), beginning to separate the benign from cancer samples.

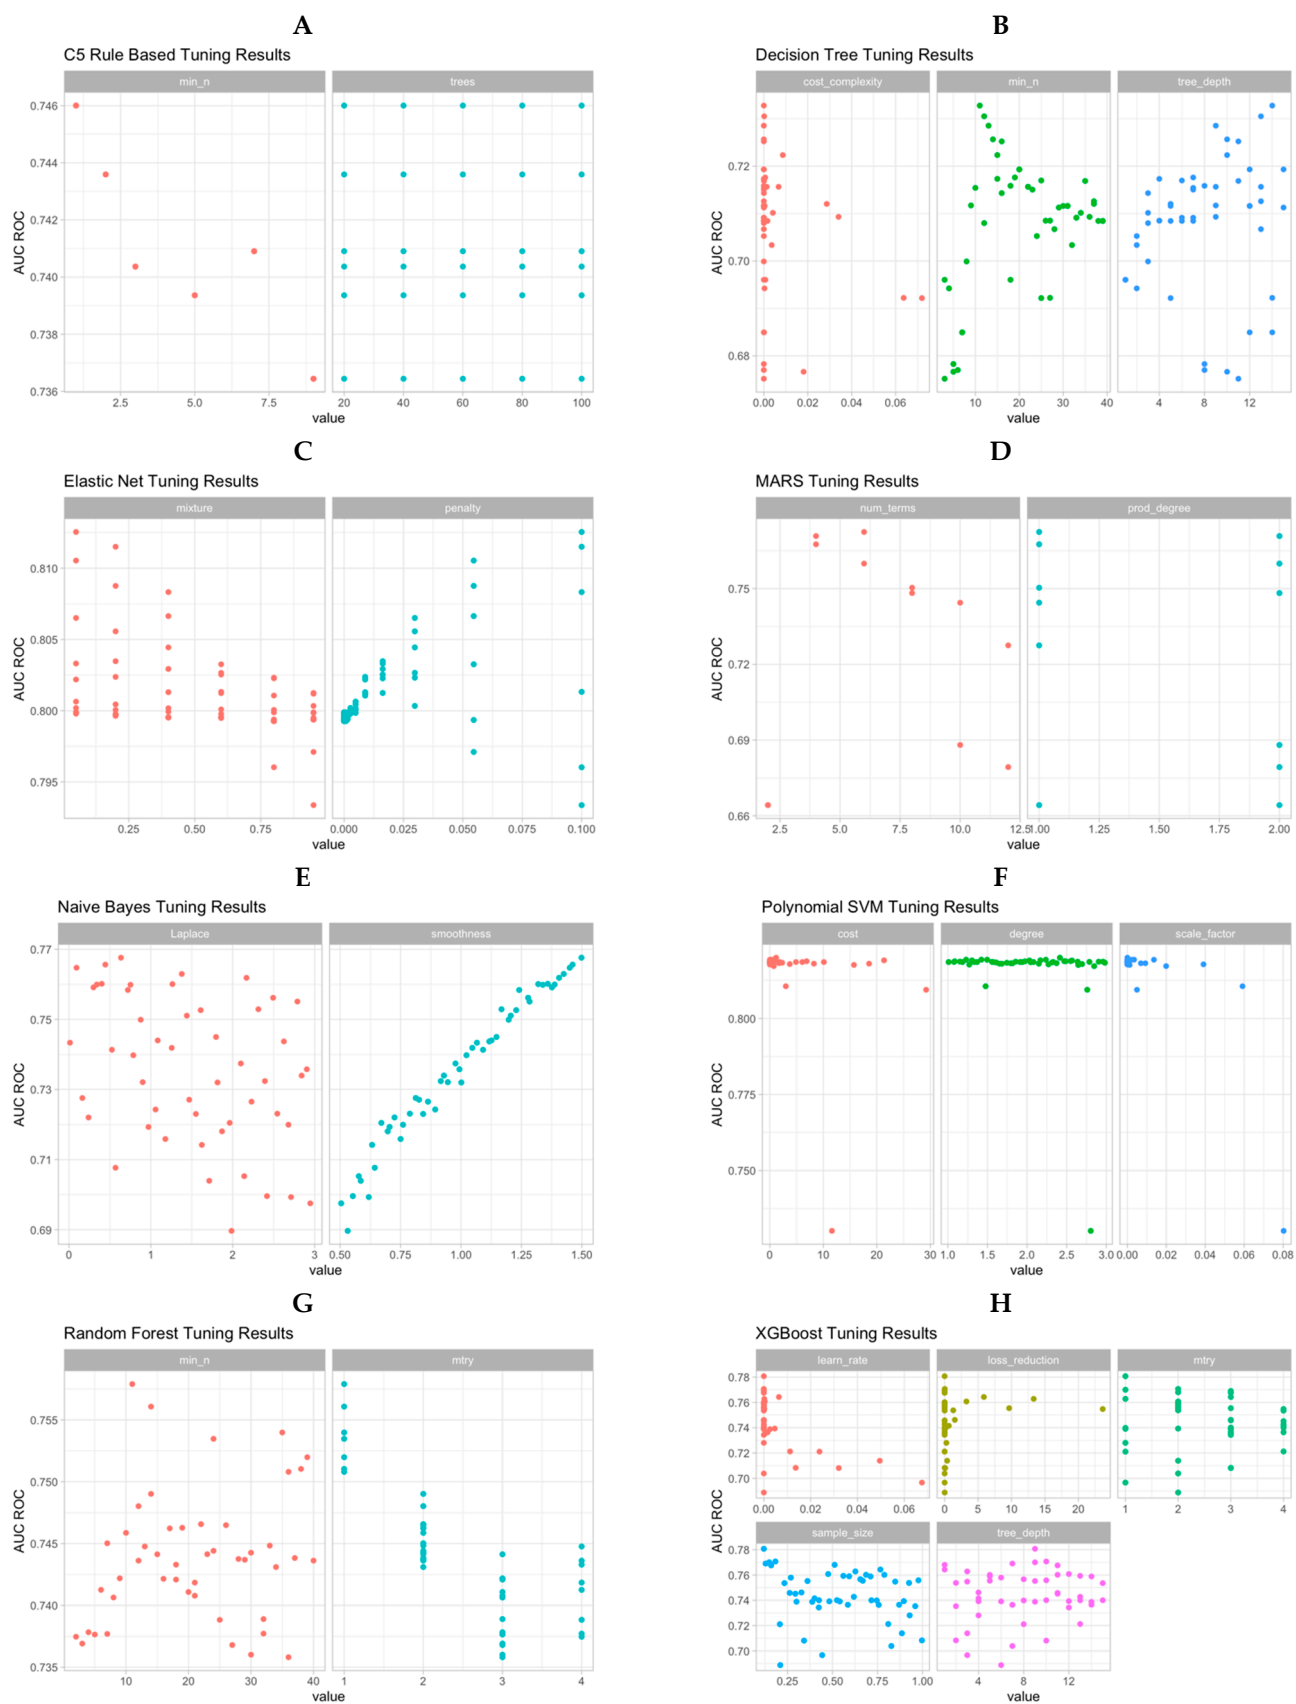

**Figure S5.** Model-specific hyperparameter tuning results of the three-variable biomarker panel across the training dataset. (A) C5.0 Rule-based; (B) Decision Tree; (C) Elastic Net; (D) Multivariate regression spline (MARS); (E) Naïve Bayes; (F) Polynomial Support Vector Machine; (G) Random Forest; (H) Extreme Gradient Boosted Trees (XGBoost). The Neural Net classifier was not tuned across a grid of parameters.

A

B

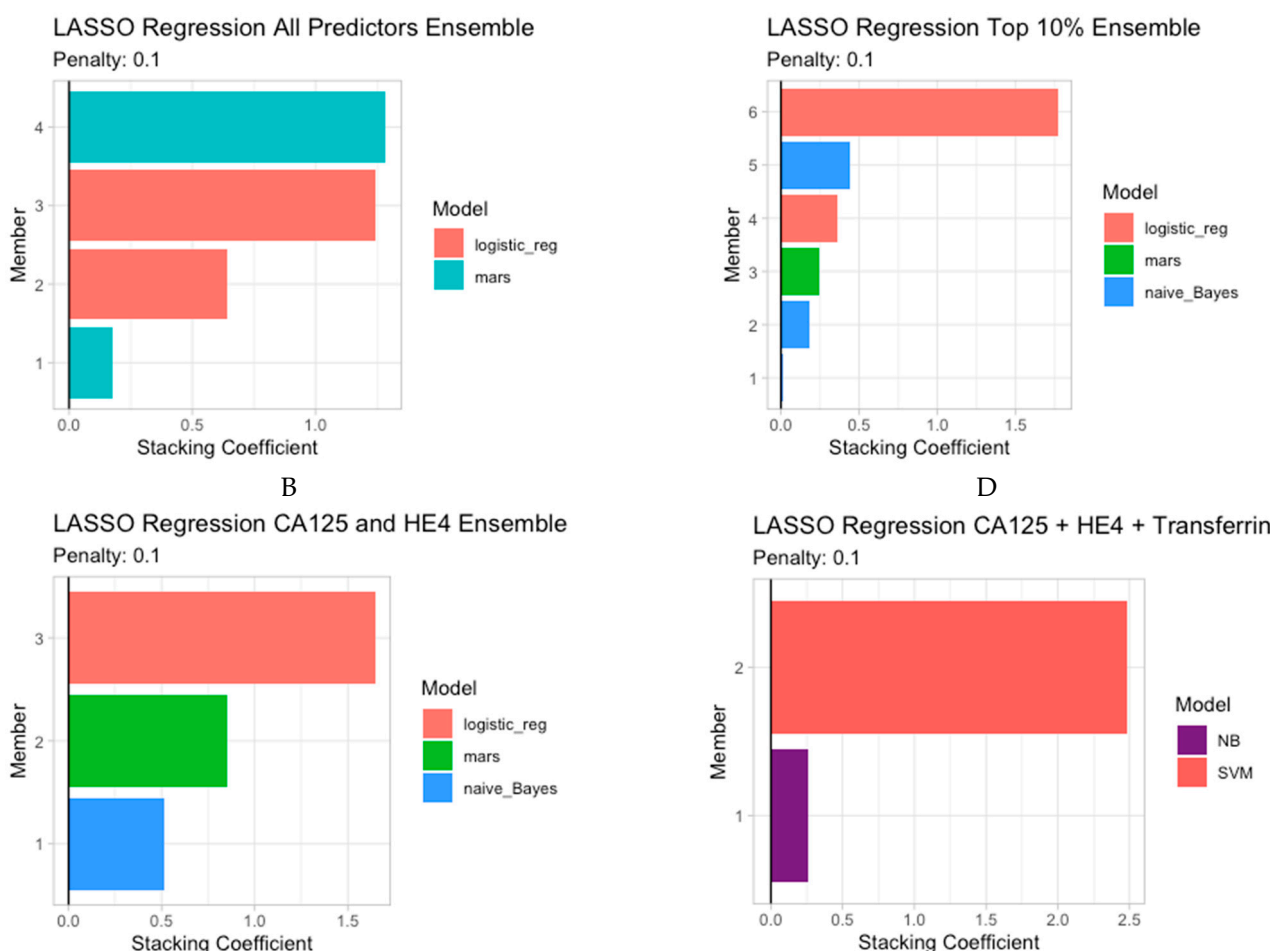

**Figure S6.** Lasso Regression results of the four ensemble stacks. (A) All predictors. (B) Top10% of predictors as defined by largest Gini impurity. (C) CA125 + HE4. (D) CA125 + HE4 + Transferrin.

**Table S1.** Demographic and biomarker variables.

| Variables           |                   |
|---------------------|-------------------|
| Age                 | CEACAM-1 (U)      |
| Menopausal status   | CEACAM-6 (U)      |
| CA125               | Ferritin (U)      |
| HE4                 | NCAM (U)          |
| YKL-40              | sVCAM (U)         |
| Transferrin         | PAI-1 (U)         |
| ApoA1               | YKL40 (U)         |
| Beta2 Microglobulin | FOLR1 (U)         |
| Transferrin         | FETA              |
| LPA (S)             | IL-27             |
| LPA (P)             | Lumican           |
| HE4 (P)             | ARC/CCL18         |
| Cyfra (P)           | Proteinase 3/RTN3 |
| CA125 (P)           | CRP (P)           |
| CEA (P)             | Fetuin A (P)      |
| ErbB2 (P)           | AGP (P)           |
| EGFR (P)            | Haptoglobin (P)   |
| CA 19-9 (P)         | PF4 (P)           |
| HIF-1a (P)          | vWF (P)           |
| ALCAM (P)           | C3 (P)            |

|                   |                   |
|-------------------|-------------------|
| CEACAM-1 (P)      | FOLR1             |
| CEACAM-6 (P)      | LRG1 (U)          |
| Ferritin (P)      | ITIH4 (U)         |
| NCAM (P)          | C4 (U)            |
| sVCAM (P)         | AAT (U)           |
| PAI-1 (total) (P) | AGP-1 (U)         |
| YKL40 (P)         | Hemopexin (U)     |
| FOLR1 (P)         | RBP-4 (U)         |
| HE4 (U)           | Transferrin (U)   |
| Cyfra (U)         | Transthyretin (U) |
| CA125 (U)         | VDBP (U)          |
| CEA (U)           | Lactoferrin       |
| ErbB2 (U)         | ALCAM (U)         |
| EGFR (U)          | CEACAM-1 (U)      |
| CA 19-9 (U)       | CEACAM-6 (U)      |
| HIF-1a (U)        | Ferritin (U)      |
| ALCAM (U)         |                   |

**Table S2.** Histopathology of benign and malignant tumors.

### **Malignancies**

#### **Epithelial Ovarian Cancer**

|                               |    |
|-------------------------------|----|
| Serous                        | 28 |
| Endometrioid                  | 2  |
| Mucinous                      | 8  |
| Clear Cell                    | 6  |
| Mixed Serous and Endometrioid | 2  |
| Germ Cell Tumor               | 2  |
| LMP Serous                    | 2  |
| LMP Mucinous                  | 2  |
| Uterine Malignancy            | 3  |
| Metastatic to the Ovary       | 6  |

### **Benign Tumors**

|                                                    |            |
|----------------------------------------------------|------------|
| Serous Cystadenoma and Cystadenofibroma            | 20         |
| Mucinous                                           | 16         |
| Endometriosis                                      | 13         |
| Teratoma                                           | 9          |
| Fibroma / Fibrothecoma                             | 7          |
| Brenner Tumor                                      | 0          |
| Simple / Hemorrhagic Cysts                         | 11         |
| Leiomyoma                                          | 1          |
| Endometrial Polyp                                  | 1          |
| Endometrial Hyperplasia                            | 1          |
| <b>Total Number of Malignant and Benign Tumors</b> | <b>140</b> |

---

**Table S3.** Tri-variable ensemble stack statistics from the testing dataset.

| <b>Model</b> | <b>AUC</b> | <b>Accuracy</b> | <b>Sensitivity</b> | <b>Specificity</b> | <b>PPV</b> | <b>NPV</b> |
|--------------|------------|-----------------|--------------------|--------------------|------------|------------|
| Ensemble     | 0.951      | 97.1%           | 93.3%              | 100.0%             | 100.0%     | 95.0%      |
| SVM          | 0.951      | 94.1%           | 93.3%              | 94.7%              | 93.3%      | 94.7%      |
| NB           | 0.867      | 82.4%           | 73.3%              | 89.5%              | 84.6%      | 81.0%      |
