# Supplementary material for: Stacking Machine Learning Algorithms for Biomarker-Based Preoperative Diagnosis of a Pelvic Mass
Source: Cancers (Basel). 2022 Mar 2;14(5):1291. doi: 10.3390/cancers14051291 (PMC8909341; doi:10.3390/cancers14051291)
Supplement: Supplementary file 1 [file cancers-14-01291-s001.zip › cancers-1561524-supplementary.csv]

Variable
Age
Menopausal status
CA125
HE4
YKL-40
Transthyretin
ApoA1
Beta2 Microglobulin
Transferrin
LPA (S)
LPA (P)
HE4 (P)
Cyfra (P)
CA125 (P)
CEA (P)
ErbB2 (P)
EGFR (P)
CA 19-9 (P)
HIF-1a (P)
ALCAM (P)
CEACAM-1 (P)
CEACAM-6 (P)
Ferritin (P)
NCAM (P)
sVCAM (P)
PAI-1 (total) (P)
YKL40 (P)
FOLR1 (P)
HE4 (U)
Cyfra (U)
CA125 (U)
CEA (U)
ErbB2 (U)
EGFR (U)
CA 19-9 (U)
HIF-1a (U)
ALCAM (U)
CEACAM-1 (U)
CEACAM-6 (U)
Ferritin (U)
NCAM (U)
sVCAM (U)
PAI-1 (U)
YKL40 (U)
FOLR1 (U)
FETA
IL-27
Lumican
ARC/CCL18
Proteinase 3/RTN3
CRP (P)
Fetuin A (P)
AGP (P)
Haptoglobin (P)
PF4 (P)
vWF (P)
C3 (P)
FOLR1
LRG1 (U)
ITIH4 (U)
C4 (U)
AAT (U)
AGP-1 (U)
Hemopexin (U)
RBP-4 (U)
Transferrin (U)
Transthyretin (U)
VDBP (U)
Lactoferrin
